# Supplementary figures and images for: A Possible Mechanism of Graphene Oxide to Enhance Thermostability of D-Psicose 3-Epimerase Revealed by Molecular Dynamics Simulations
Source: MDPI journal article supplement (doi:10.3390/ijms221910813), 2021-10-06

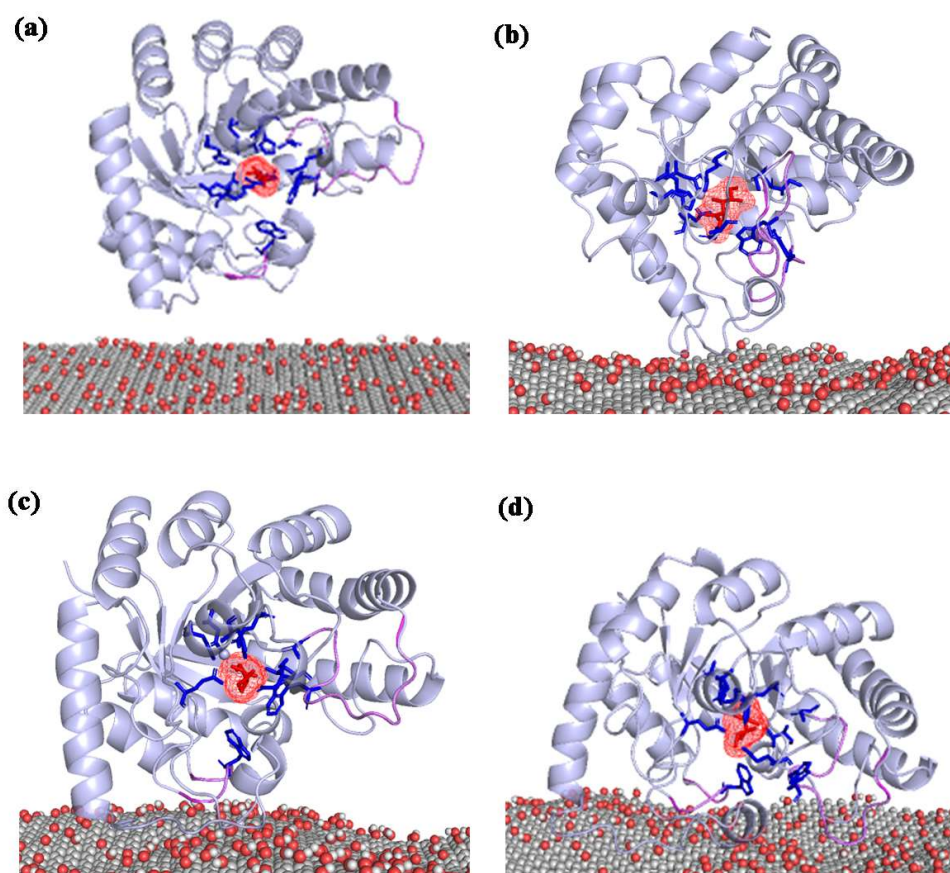

**Figure S1.** Adsorption process of enzyme on GO at 50 °C. The snapshots of (a) 0 ns; (b) 30 ns; (c) 70 ns; (d) 100 ns.

Supplement: s1 [file s1]
